# Supplementary material
Source: PubMed Central journal article supplement (PMC4847718)
Supplement: NIHMS775630-supplement-Supplement1.pdf [file NIHMS775630-supplement-Supplement1.pdf]

## Supplementary Appendix

This appendix has been provided by the authors to give readers additional information about their work.

Supplement to: Kakuru A, Jagannathan P, Muhindo MK, et al. Dihydroartemisinin–piperaquine for the prevention of malaria in pregnancy. *N Engl J Med* 2016;374:928-39. DOI: 10.1056/NEJMoa1509150

## **Supplemental Appendix**

### **Table of contents**

Figure S1.....2

Table S1.....3

Table S2.....4

Table S3.....5

Table S4.....6

**Figure S1**

**Title:** Histological outcomes stratified by treatment arm and gravidity

**Legend A:** Prevalence of any evidence of placental malaria by histopathology

**Legend B:** Prevalence of moderate-high grade pigment deposition

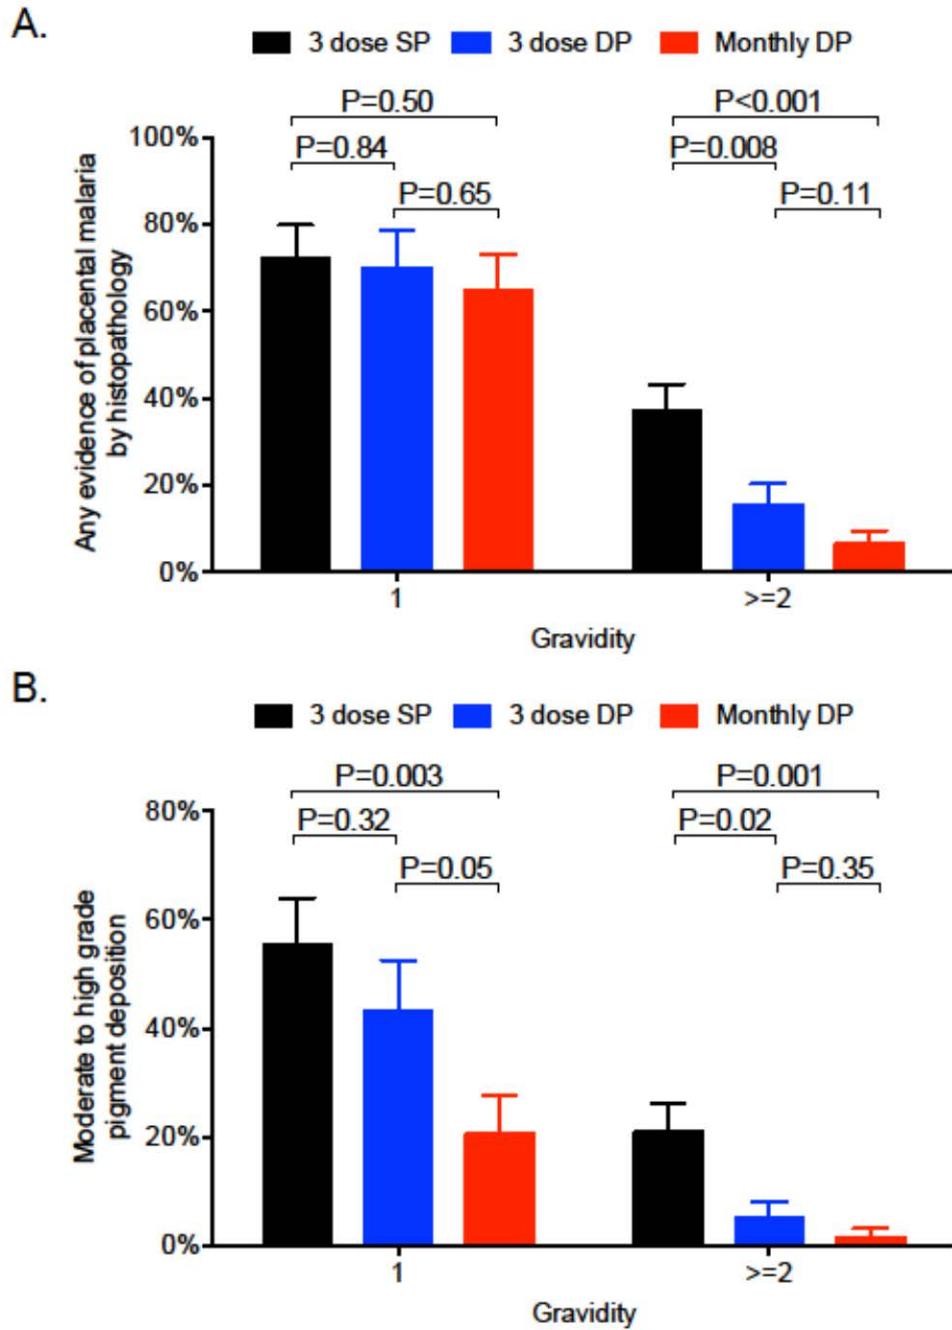

**Table S1. Histopathological findings of placental malaria**

| Outcomes                                                      | Treatment arm       |                        |                      |
|---------------------------------------------------------------|---------------------|------------------------|----------------------|
|                                                               | 3 dose SP<br>(n=98) | 3 dose DP<br>(n=88)    | Monthly DP<br>(n=96) |
| Rogerson classification system – no. (%)                      |                     |                        |                      |
| No parasites or pigment                                       | 49 (50.0)           | 58 (65.9)              | 70 (72.9)            |
| Parasites, pigment in monocytes and fibrin                    | 5 (5.1)             | 1 (1.14)               | 0 (0.0)              |
| Parasites, pigment in fibrin only                             | 0 (0.0)             | 1 (1.14)               | 0 (0.0)              |
| No parasite, pigment only                                     | 44 (44.9)           | 28 (31.8)              | 26 (27.1)            |
| Moderate-high grade pigment deposition <sup>a</sup> – no. (%) | 33 (33.7)           | 16 (18.2) <sup>b</sup> | 8 (8.3) <sup>c</sup> |

<sup>a</sup> Malaria pigment detected in  $\geq 5\%$  of high power fields

<sup>b</sup> Significant difference between 3 dose DP and 3 dose SP arms (P=0.02)

<sup>c</sup> Significant differences between monthly DP and 3 dose SP (P<0.001) and 3 dose DP arms (P=0.05)

**Table S2. Description of all women with any adverse birth outcome**

| Treatment arm | Gestational age (weeks) | Birth weight (gm) | Spontaneous abortion | Stillbirth | Low birth weight | Preterm delivery | Congenital anomaly |
|---------------|-------------------------|-------------------|----------------------|------------|------------------|------------------|--------------------|
| 3 dose SP     | N/A                     | N/A               | X                    |            |                  |                  |                    |
| 3 dose SP     | N/A                     | N/A               | X                    |            |                  |                  |                    |
| 3 dose SP     | N/A                     | N/A               | X                    |            |                  |                  |                    |
| 3 dose SP     | 38                      | 2390              |                      |            | X                |                  |                    |
| 3 dose SP     | 39                      | 2130              |                      |            | X                |                  |                    |
| 3 dose SP     | 39                      | 2480              |                      |            | X                |                  |                    |
| 3 dose SP     | 40                      | 2180              |                      |            | X                |                  |                    |
| 3 dose SP     | 36                      | 3000              |                      |            |                  | X                |                    |
| 3 dose SP     | 38                      | 2420              |                      |            | X                |                  |                    |
| 3 dose SP     | 36                      | 2800              |                      |            |                  | X                |                    |
| 3 dose SP     | 35                      | 2350              |                      |            | X                | X                |                    |
| 3 dose SP     | 38                      | 2230              |                      |            | X                |                  |                    |
| 3 dose SP     | 35                      | 2410              |                      |            | X                | X                | polydactyl         |
| 3 dose SP     | 31                      | 1490              |                      |            | X                | X                | club foot          |
| 3 dose SP     | 40                      | 2470              |                      |            | X                |                  |                    |
| 3 dose SP     | 33                      | 2210              |                      |            | X                | X                |                    |
| 3 dose SP     | 34                      | 2180              |                      |            | X                | X                |                    |
| 3 dose SP     | 38                      | 950               |                      | X          | X                |                  |                    |
| 3 dose SP     | 33                      | 2160              |                      |            | X                | X                |                    |
| 3 dose DP     | 31                      | 1430              |                      |            | X                | X                |                    |
| 3 dose DP     | 40                      | 2910              |                      |            |                  |                  | undescended testis |
| 3 dose DP     | 41                      | 2940              |                      |            |                  |                  | polydactyl         |
| 3 dose DP     | 34                      | 2180              |                      | X          | X                | X                |                    |
| 3 dose DP     | 36                      | 2650              |                      |            |                  | X                |                    |
| 3 dose DP     | 41                      | 2490              |                      |            | X                |                  |                    |
| 3 dose DP     | 39                      | 3150              |                      |            |                  |                  | hypospadias        |
| 3 dose DP     | 32                      | 1710              |                      |            | X                | X                |                    |
| 3 dose DP     | 38                      | 2450              |                      |            | X                |                  |                    |
| 3 dose DP     | 36                      | 2210              |                      |            | X                | X                |                    |
| 3 dose DP     | 36                      | 1320              |                      |            | X                | X                |                    |
| 3 dose DP     | 29                      | 1240              |                      |            | X                | X                |                    |
| 3 dose DP     | 40                      | 2450              |                      |            | X                |                  |                    |
| 3 dose DP     | 33                      | 2300              |                      |            | X                | X                |                    |
| 3 dose DP     | 31                      | 1320              |                      |            | X                | X                |                    |
| 3 dose DP     | 34                      | 1740              |                      |            | X                | X                |                    |
| 3 dose DP     | 39                      | 2870              |                      |            |                  |                  | polydactyl         |
| 3 dose DP     | 40                      | 1850              |                      |            | X                |                  |                    |
| 3 dose DP     | 35                      | 2440              |                      |            | X                | X                |                    |
| Monthly DP    | 35                      | 2140              |                      |            | X                | X                |                    |
| Monthly DP    | 35                      | 2500              |                      |            |                  | X                |                    |
| Monthly DP    | 39                      | 2300              |                      |            | X                |                  |                    |
| Monthly DP    | 39                      | 2240              |                      |            | X                |                  |                    |
| Monthly DP    | 34                      | 1600              |                      |            | X                | X                |                    |
| Monthly DP    | 37                      | 2420              |                      |            | X                |                  |                    |
| Monthly DP    | 38                      | 2000              |                      |            | X                |                  |                    |
| Monthly DP    | 32                      | 1970              |                      |            | X                | X                |                    |
| Monthly DP    | 32                      | 2000              |                      | X          | X                | X                |                    |

**Table S3. Comparison of efficacy outcomes between 3 dose DP and monthly DP arms**

| <b>Incidence measures during pregnancy</b>          | <b>IRR (95% CI) <sup>a</sup></b> | <b>P-value</b> |
|-----------------------------------------------------|----------------------------------|----------------|
| Symptomatic malaria                                 | 0 (0-0.16)                       | <0.001         |
| <b>Prevalence measures during pregnancy</b>         | <b>RR (95% CI) <sup>a</sup></b>  | <b>P-value</b> |
| Detection of malaria parasites by LAMP <sup>b</sup> | 0.33 (0.20-0.54)                 | <0.001         |
| Anemia (Hb < 11 g/dL) <sup>b</sup>                  | 0.76 (0.50-1.15)                 | 0.19           |
| <b>Outcomes assessed at delivery</b>                | <b>RR (95% CI) <sup>a</sup></b>  | <b>P-value</b> |
| Malaria positivity, by test                         |                                  |                |
| Histopathology                                      | 0.79 (0.51-1.23)                 | 0.30           |
| Placental blood by microscopy                       | 0 (0-0.80)                       | 0.11           |
| Placental blood by LAMP                             | 0.61 (0.10-3.57)                 | 0.67           |
| Maternal blood by microscopy                        | 0 (0-5.30)                       | 0.48           |
| Maternal blood by LAMP                              | 0.30 (0.03-2.86)                 | 0.35           |
| Cord blood by microscopy                            | N/A                              | N/A            |
| Cord blood by LAMP                                  | N/A                              | N/A            |
| Birth outcomes                                      |                                  |                |
| Spontaneous abortion                                | N/A                              | N/A            |
| Stillbirth <sup>c</sup>                             | 0.91 (0.06-14.3)                 | 1.0            |
| Low birth weight <sup>c</sup>                       | 0.52 (0.23-1.18)                 | 0.11           |
| Preterm delivery <sup>c</sup>                       | 0.41 (0.15-1.14)                 | 0.08           |
| Congenital anomaly <sup>c</sup>                     | 0 (0-0.56)                       | 0.05           |
| Composite adverse birth outcome                     | 0.43 (0.21-0.90)                 | 0.02           |

<sup>a</sup>Reference group 3 dose DP

<sup>b</sup>Repeated measures assessed at the time of all routine visits following administration of study drugs

<sup>c</sup>Only includes those who delivered after at least 28 weeks gestational age

**Table S4. ECG measurements before and after study drugs administered at 28 weeks gestational age**

| <b>Characteristic</b>                          | <b>Treatment arm</b>        |                             |                              |
|------------------------------------------------|-----------------------------|-----------------------------|------------------------------|
|                                                | <b>3 dose SP<br/>(n=12)</b> | <b>3 dose DP<br/>(n=17)</b> | <b>Monthly DP<br/>(n=13)</b> |
| Day 0 QTc interval in msec, median (range)     | 385 (340-410)               | 390 (360-410)               | 380 (350-430)                |
| Day 2 QTc interval in msec, median (range)     | 390 (360-450)               | 410 (370-450)               | 390 (380-420)                |
| Change in QTc interval in msec, median (range) | 5 (-40-60)                  | 20 (-10-50)                 | 30 (-30-50)                  |
